# Supplementary material
Source: Springer Nature journal article supplement (https://www.springermedizin.de/resource/supplementary/12906_2013_1484_MOESM1_ESM.pdf/9521998)

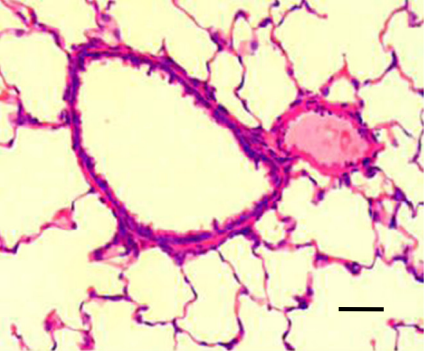

**Control group**

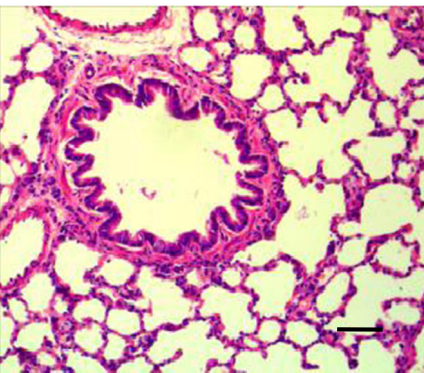

**Asthma group**

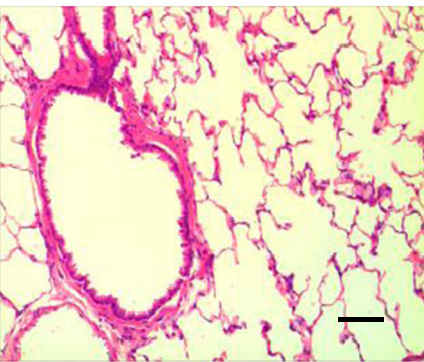

**SMI group**

Supplement: MOESM1 [file 9521998]
